# Supplementary material for: Performance of long-chain mid-chan diol based temperature and productivity proxies at test: a five-years sediment trap record from the Mauritanian upwelling
Source: Copernicus journal article supplement (doi:10.5194/bg-2021-309), 2021-11-18
Supplement: Supplementary file [file bg-2021-309-AC1-supplement.pdf]

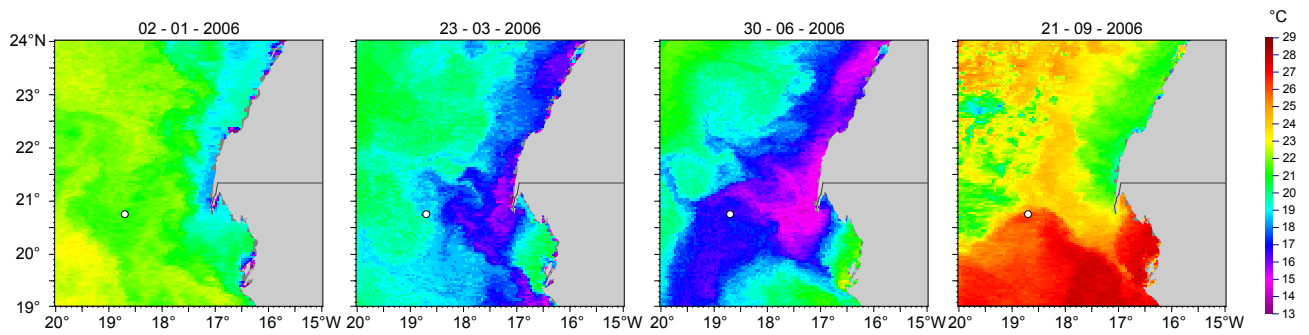

**Figure RC2-1: Temperature distribution off Cap Blanc for four days, each from a different season. The location of sediment trap CBeu is indicated by a white circle. Colder waters near the African coast result from upwelling. The westward extension and location of colder upwelled waters is highly variable as is upwelling. Days of with strong (30-6-2006) or weak (02-01-2006) upwelling may occur any time of the year. From mid July to November a temperature pattern similar to that of 21-09-2006 is more typical.**
