# Supplementary material for: Performance of long-chain mid-chan diol based temperature and productivity proxies at test: a five-years sediment trap record from the Mauritanian upwelling
Source: Copernicus journal article supplement (doi:10.5194/bg-2021-309), 2021-11-18
Supplement: Supplementary file [file bg-2021-309-AC2-supplement.pdf]

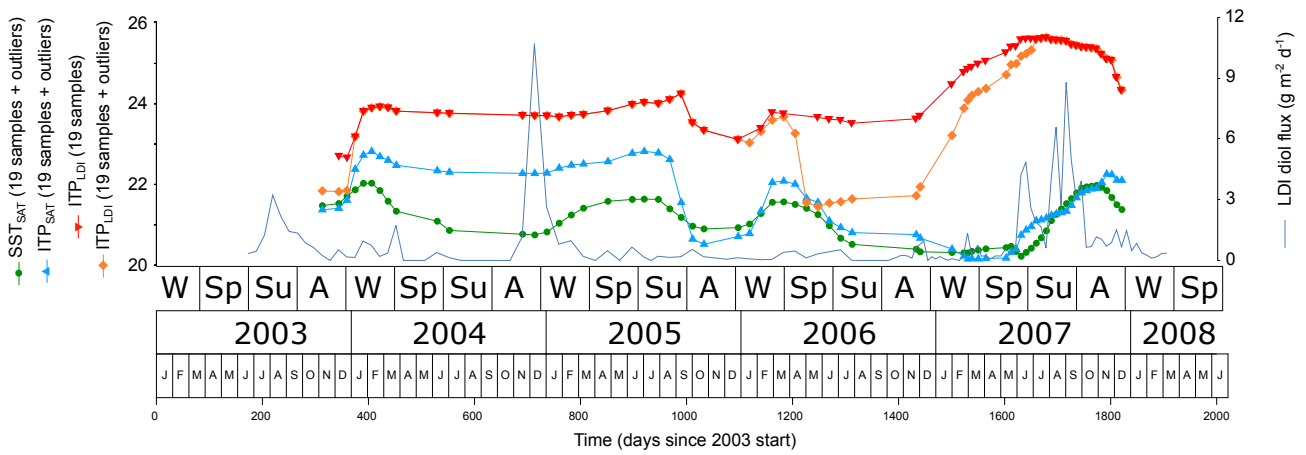

**Figure RC1-1. Nineteen sample moving average SST<sub>SAT</sub> (green spheres) and nineteen sample moving integrated production temperatures for SST<sub>SAT</sub> (IPT<sub>SAT</sub>, blue upward triangles) and for SST<sub>LDI</sub> (IPT<sub>LDI</sub>, orange diamonds), both based on the LDI diol fluxes and the respective SST records. Samples with LDI outliers (values < 17°C) are included except for the upper graph of IPT<sub>LDI</sub> (red downward pointing triangles). For reference, the LDI dot flux is included as well.**
